# Supplementary material for: Graphyne-anchored single Fe atoms as efficient CO oxidation catalysts as predicted by DFT calculations
Source: Royal Society of Chemistry journal article supplement (doi:10.1039/d0cp00178c), 2020-01-01
Supplement: d0cp00178c1.pdf [file d0cp00178c1.pdf]

## Electronic Supplementary Information

# Graphyne-Anchored Single Fe Atoms as Efficient CO Oxidation Catalyst as Predicted by DFT Calculations

Jiapeng Ma,<sup>a,c</sup> Si Wu,<sup>a</sup> Yuan Yuan,<sup>a</sup> Hui Mao,<sup>b</sup> Jin Yong Lee<sup>a,c,\*</sup> and Baotao Kang,<sup>a,\*</sup>

<sup>a</sup> School of Chemistry and Chemical Engineering, University of Jinan, Jinan,  
Shandong 250022, P. R. China  
E-mail: chm\_kangbt@ujn.edu.cn

<sup>b</sup> Pharmaceutical and Material Engineering School, Jinhua Polytechnic, Jinhua,  
321007, Zhejiang, P. R. China.  
E-mail: maohui1988@126.com

<sup>c</sup> Department of Chemistry, Sungkyunkwan University, Suwon, 16419, Republic of  
Korea  
E-mail: jinylee@skku.edu

### Table of contents

1. Optimized structures and binding energies of all studied single Fe atom adsorbed on pristine 2D  $\alpha$ Gy.
2. Calculated deformation electron densities of Fe atom adsorbed on pristine (left) and SAV- $\alpha$ Gy.

| Site       | B12 | T1    | T2 | B11   | H     |
|------------|-----|-------|----|-------|-------|
| Top View   |     |       |    |       |       |
| Side View  |     |       |    |       |       |
| $E_b$ (eV) |     | -3.36 |    | -2.91 | -0.45 |

**Figure S1.** Optimized structures and binding energies of all studied single Fe atom adsorbed on pristine 2D  $\alpha$ Gy.

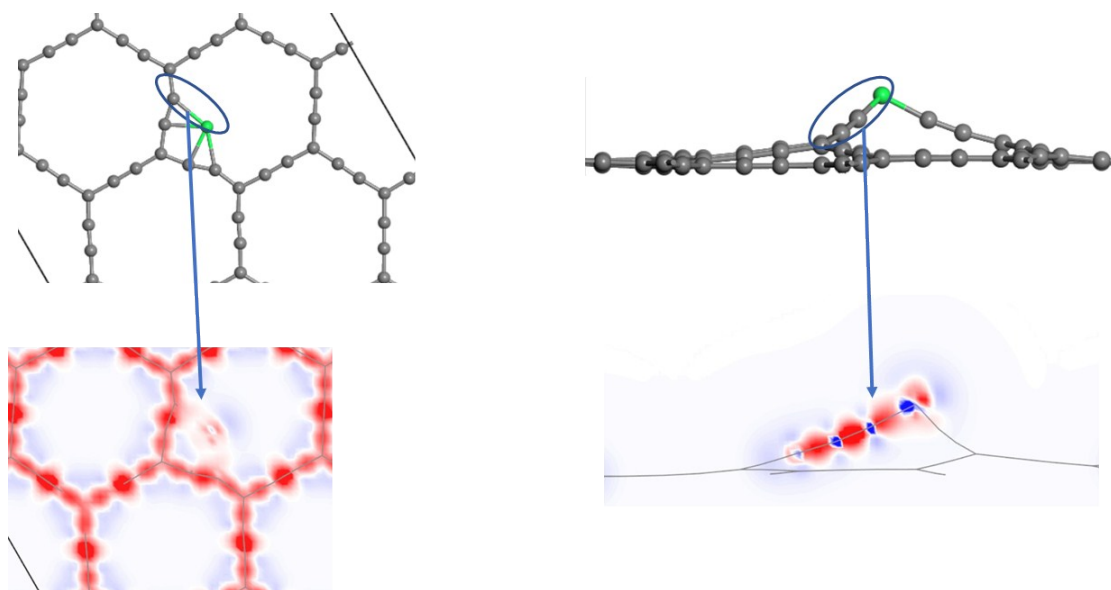

**Figure S2** Calculated deformation electron densities of Fe atom adsorbed on pristine (left) and SAV- $\alpha$ Gy.
